# Supplementary material
Source: MDPI journal article supplement (https://www.mdpi.com/2073-4441/13/13/1832)
Supplement: s1 [file s1]

**Table S1.** Exceedance frequencies of stations based on AMS data at each station for each region

| Region | Station ID | Data years | Return period (R.P.)/Exceedance probability (E.P.) |              |               |               |               |                |
|--------|------------|------------|----------------------------------------------------|--------------|---------------|---------------|---------------|----------------|
|        |            |            | 2-yr<br>0.50                                       | 5-yr<br>0.20 | 10-yr<br>0.10 | 25-yr<br>0.04 | 50-yr<br>0.02 | 100-yr<br>0.01 |
| I      | 58012      | 51         | 0.490                                              | 0.216        | 0.098         | 0.078         | 0.020         | 0.020          |
|        | 58013      | 51         | 0.510                                              | 0.157        | 0.118         | 0.078         | 0.039         | 0.020          |
|        | 58026      | 51         | 0.529                                              | 0.196        | 0.118         | 0.039         | 0.020         | 0.020          |
|        | 58027      | 51         | 0.510                                              | 0.196        | 0.118         | 0.039         | 0.020         | 0.020          |
|        | 58035      | 51         | 0.490                                              | 0.216        | 0.137         | 0.020         | 0.020         | 0.020          |
|        | 58036      | 51         | 0.529                                              | 0.196        | 0.118         | 0.039         | 0.020         | 0.000          |
|        | 58130      | 51         | 0.510                                              | 0.196        | 0.137         | 0.059         | 0.020         | 0.020          |
|        | 58131      | 51         | 0.569                                              | 0.255        | 0.137         | 0.039         | 0.020         | 0.000          |
|        | 58132      | 51         | 0.549                                              | 0.255        | 0.118         | 0.039         | 0.020         | 0.000          |
|        | 58135      | 51         | 0.490                                              | 0.216        | 0.137         | 0.078         | 0.020         | 0.000          |
| II     | 58038      | 51         | 0.529                                              | 0.196        | 0.059         | 0.059         | 0.020         | 0.020          |
|        | 58040      | 51         | 0.510                                              | 0.216        | 0.118         | 0.020         | 0.000         | 0.000          |
|        | 58044      | 51         | 0.549                                              | 0.157        | 0.078         | 0.020         | 0.020         | 0.020          |
|        | 58047      | 51         | 0.529                                              | 0.157        | 0.059         | 0.059         | 0.020         | 0.020          |
|        | 58048      | 51         | 0.431                                              | 0.176        | 0.137         | 0.059         | 0.020         | 0.020          |
|        | 58049      | 51         | 0.510                                              | 0.216        | 0.137         | 0.020         | 0.020         | 0.020          |
|        | 58138      | 51         | 0.471                                              | 0.216        | 0.118         | 0.098         | 0.039         | 0.000          |
|        | 58139      | 51         | 0.510                                              | 0.196        | 0.078         | 0.039         | 0.020         | 0.000          |
|        | 58140      | 51         | 0.529                                              | 0.216        | 0.098         | 0.059         | 0.020         | 0.000          |
|        | 58141      | 51         | 0.510                                              | 0.157        | 0.098         | 0.039         | 0.020         | 0.000          |
|        | 58143      | 51         | 0.529                                              | 0.294        | 0.137         | 0.020         | 0.000         | 0.000          |
|        | 58145      | 51         | 0.490                                              | 0.235        | 0.137         | 0.039         | 0.020         | 0.000          |
|        | 58150      | 51         | 0.471                                              | 0.176        | 0.118         | 0.059         | 0.059         | 0.039          |
| III    | 58146      | 51         | 0.471                                              | 0.216        | 0.118         | 0.039         | 0.020         | 0.020          |
|        | 58147      | 51         | 0.510                                              | 0.216        | 0.118         | 0.020         | 0.020         | 0.020          |
|        | 58148      | 51         | 0.471                                              | 0.176        | 0.118         | 0.039         | 0.020         | 0.000          |
|        | 58154      | 51         | 0.529                                              | 0.196        | 0.078         | 0.020         | 0.020         | 0.000          |
|        | 58158      | 51         | 0.490                                              | 0.216        | 0.176         | 0.078         | 0.020         | 0.020          |
|        | 58241      | 51         | 0.510                                              | 0.176        | 0.157         | 0.059         | 0.020         | 0.000          |
|        | 58243      | 51         | 0.490                                              | 0.196        | 0.098         | 0.059         | 0.020         | 0.000          |
|        | 58251      | 51         | 0.529                                              | 0.216        | 0.098         | 0.039         | 0.020         | 0.020          |
| IV     | 58235      | 51         | 0.549                                              | 0.255        | 0.059         | 0.039         | 0.020         | 0.020          |
|        | 58237      | 51         | 0.490                                              | 0.275        | 0.157         | 0.059         | 0.020         | 0.020          |
|        | 58238      | 51         | 0.529                                              | 0.255        | 0.098         | 0.020         | 0.020         | 0.000          |
|        | 58242      | 51         | 0.490                                              | 0.176        | 0.098         | 0.078         | 0.059         | 0.059          |
|        | 58244      | 51         | 0.471                                              | 0.196        | 0.118         | 0.039         | 0.020         | 0.000          |
|        | 58245      | 51         | 0.490                                              | 0.216        | 0.098         | 0.059         | 0.020         | 0.020          |
|        | 58246      | 51         | 0.490                                              | 0.216        | 0.157         | 0.020         | 0.020         | 0.000          |
|        | 58247      | 51         | 0.471                                              | 0.176        | 0.098         | 0.059         | 0.039         | 0.039          |
|        | 58339      | 51         | 0.549                                              | 0.196        | 0.078         | 0.039         | 0.039         | 0.000          |
|        | 58340      | 51         | 0.529                                              | 0.196        | 0.098         | 0.020         | 0.000         | 0.000          |

|   |       |    |       |       |       |       |       |       |
|---|-------|----|-------|-------|-------|-------|-------|-------|
|   | 58341 | 51 | 0.471 | 0.196 | 0.098 | 0.059 | 0.039 | 0.020 |
|   | 58342 | 51 | 0.471 | 0.275 | 0.118 | 0.039 | 0.020 | 0.000 |
|   | 58344 | 51 | 0.490 | 0.196 | 0.078 | 0.039 | 0.020 | 0.020 |
|   | 58345 | 51 | 0.588 | 0.235 | 0.078 | 0.020 | 0.000 | 0.000 |
|   | 58346 | 51 | 0.549 | 0.196 | 0.078 | 0.020 | 0.000 | 0.000 |
| V | 58255 | 51 | 0.490 | 0.157 | 0.137 | 0.059 | 0.039 | 0.020 |
|   | 58257 | 51 | 0.529 | 0.157 | 0.098 | 0.059 | 0.059 | 0.020 |
|   | 58259 | 51 | 0.490 | 0.196 | 0.059 | 0.059 | 0.039 | 0.020 |
|   | 58264 | 51 | 0.471 | 0.176 | 0.098 | 0.059 | 0.039 | 0.020 |
|   | 58265 | 51 | 0.529 | 0.196 | 0.137 | 0.039 | 0.000 | 0.000 |
|   | 58268 | 51 | 0.569 | 0.255 | 0.098 | 0.039 | 0.000 | 0.000 |
|   | 58269 | 51 | 0.510 | 0.216 | 0.059 | 0.039 | 0.000 | 0.000 |
|   | 58343 | 51 | 0.471 | 0.196 | 0.137 | 0.020 | 0.000 | 0.000 |
|   | 58349 | 51 | 0.471 | 0.216 | 0.118 | 0.039 | 0.020 | 0.020 |
|   | 58351 | 51 | 0.510 | 0.216 | 0.098 | 0.039 | 0.039 | 0.020 |
|   | 58352 | 51 | 0.490 | 0.176 | 0.098 | 0.059 | 0.020 | 0.020 |
|   | 58354 | 51 | 0.549 | 0.157 | 0.059 | 0.039 | 0.020 | 0.000 |
|   | 58356 | 51 | 0.471 | 0.275 | 0.137 | 0.039 | 0.020 | 0.000 |
|   | 58358 | 51 | 0.529 | 0.196 | 0.078 | 0.020 | 0.020 | 0.000 |
|   | 58359 | 51 | 0.471 | 0.157 | 0.137 | 0.059 | 0.020 | 0.020 |
|   | 58360 | 51 | 0.510 | 0.235 | 0.098 | 0.020 | 0.000 | 0.000 |
|   | 58377 | 51 | 0.471 | 0.255 | 0.157 | 0.059 | 0.020 | 0.000 |

**Table S2.** Quantile estimates of extreme precipitation for a 1-day duration from 2-yr to 100-yr return periods in homogeneous region II, III, IV and V

| Region | Station ID | Station Name | Quantile estimates based on AES data |       |       |       |       |        |
|--------|------------|--------------|--------------------------------------|-------|-------|-------|-------|--------|
|        |            |              | 2-yr                                 | 5-yr  | 10-yr | 25-yr | 50-yr | 100-yr |
| II     | 58038      | Shuyang      | 111.3                                | 141.4 | 165.1 | 197.6 | 223.3 | 249.9  |
|        | 58040      | Ganyu        | 117.1                                | 148.7 | 173.6 | 207.9 | 234.9 | 262.9  |
|        | 58044      | Lianyungang  | 109.1                                | 138.5 | 161.7 | 193.7 | 218.8 | 244.8  |
|        | 58047      | Guanyun      | 108.7                                | 138.1 | 161.2 | 193.0 | 218.0 | 244.0  |
|        | 58048      | Guannan      | 104.1                                | 132.1 | 154.2 | 184.7 | 208.7 | 233.5  |
|        | 58049      | Binhai       | 111.6                                | 141.7 | 165.4 | 198.1 | 223.8 | 250.5  |
|        | 58138      | Xuyi         | 108.7                                | 138.1 | 161.2 | 193.0 | 218.1 | 244.0  |
|        | 58139      | Hongze       | 99.5                                 | 126.6 | 150.8 | 189.0 | 223.3 | 262.7  |
|        | 58140      | Lianshui     | 113.3                                | 143.9 | 168.0 | 201.1 | 227.2 | 254.3  |
|        | 58141      | Huai'an      | 105.6                                | 134.1 | 156.5 | 187.4 | 211.8 | 237.0  |
|        | 58143      | Funing       | 111.5                                | 141.6 | 165.3 | 198.0 | 223.7 | 250.3  |
|        | 58145      | Chuzhou      | 107.2                                | 136.2 | 159.0 | 190.3 | 215.1 | 240.6  |
| III    | 58150      | Sheyang      | 106.9                                | 135.8 | 158.5 | 189.8 | 214.4 | 239.9  |
|        | 58146      | Jianhu       | 98.0                                 | 124.5 | 145.3 | 174.0 | 196.6 | 220.0  |
|        | 58147      | Jinhu        | 99.3                                 | 126.1 | 147.2 | 176.3 | 199.1 | 222.8  |
|        | 58148      | Baoying      | 93.8                                 | 119.2 | 139.1 | 166.6 | 188.2 | 210.6  |
|        | 58154      | Yancheng     | 97.0                                 | 123.2 | 143.8 | 172.2 | 194.5 | 217.7  |
|        | 58158      | Dafeng       | 108.8                                | 141.5 | 169.1 | 209.6 | 243.7 | 281.0  |
|        | 58241      | Gaoyou       | 98.6                                 | 128.3 | 153.3 | 190.0 | 221.0 | 254.8  |
|        | 58243      | Xinghua      | 98.8                                 | 128.5 | 153.6 | 190.3 | 221.3 | 255.2  |
|        | 58251      | Dongtai      | 100.9                                | 131.3 | 156.8 | 194.4 | 226.0 | 260.7  |

| IV     | 58235      | Luhe         | 95.1                                                     | 123.7 | 147.8 | 183.2 | 213.0 | 245.6  |
|--------|------------|--------------|----------------------------------------------------------|-------|-------|-------|-------|--------|
|        | 58237      | Pukou        | 109.5                                                    | 142.8 | 168.4 | 202.9 | 229.5 | 256.4  |
|        | 58238      | Nanjing      | 103.3                                                    | 134.8 | 159.0 | 191.6 | 216.7 | 242.1  |
|        | 58242      | Yizheng      | 100.5                                                    | 130.8 | 156.2 | 193.6 | 225.1 | 259.7  |
|        | 58244      | Jiangdou     | 95.8                                                     | 124.7 | 148.9 | 184.6 | 214.6 | 247.5  |
|        | 58245      | Yangzhou     | 98.4                                                     | 128.0 | 152.9 | 189.5 | 220.4 | 254.2  |
|        | 58246      | Taizhou      | 91.8                                                     | 119.4 | 142.6 | 176.8 | 205.6 | 237.1  |
|        | 58247      | Yangzhong    | 102.2                                                    | 133.0 | 158.9 | 197.0 | 229.0 | 264.1  |
|        | 58339      | Gaochun      | 101.5                                                    | 129.6 | 153.4 | 188.6 | 218.4 | 251.2  |
|        | 58340      | Lishui       | 93.8                                                     | 122.3 | 144.3 | 173.9 | 196.6 | 219.7  |
|        | 58341      | Danyang      | 95.9                                                     | 125.1 | 147.6 | 177.8 | 201.1 | 224.7  |
|        | 58342      | Jintan       | 101.4                                                    | 132.3 | 156.1 | 188.0 | 212.6 | 237.6  |
|        | 58344      | Jurong       | 100.2                                                    | 130.7 | 154.2 | 185.7 | 210.0 | 234.7  |
|        | 58345      | Liyang       | 86.1                                                     | 110.0 | 130.2 | 160.1 | 185.4 | 213.3  |
|        | 58346      | Yixing       | 94.2                                                     | 120.3 | 142.4 | 175.0 | 202.7 | 233.1  |
| V      | 58255      | Rugao        | 96.3                                                     | 125.6 | 148.2 | 178.5 | 201.9 | 225.6  |
|        | 58257      | Jingjiang    | 96.2                                                     | 125.5 | 148.0 | 178.4 | 201.7 | 225.4  |
|        | 58259      | Nantong      | 95.1                                                     | 124.1 | 146.3 | 176.3 | 199.4 | 222.8  |
|        | 58264      | Rudong       | 98.3                                                     | 128.2 | 151.2 | 182.2 | 206.1 | 230.3  |
|        | 58265      | Lusi         | 104.1                                                    | 135.8 | 160.2 | 193.0 | 218.2 | 243.8  |
|        | 58268      | Tongzhou     | 98.9                                                     | 129.0 | 152.1 | 183.3 | 207.3 | 231.6  |
|        | 58269      | Qidong       | 94.7                                                     | 123.5 | 145.6 | 175.5 | 198.4 | 221.7  |
|        | 58343      | Changzhou    | 93.4                                                     | 121.8 | 143.7 | 173.2 | 195.8 | 218.8  |
|        | 58349      | Wuzhong      | 86.8                                                     | 110.9 | 131.3 | 161.4 | 186.9 | 214.9  |
|        | 58351      | Jiangyin     | 98.6                                                     | 128.6 | 151.7 | 182.7 | 206.6 | 230.9  |
|        | 58352      | Changshu     | 92.0                                                     | 117.5 | 139.1 | 171.0 | 198.0 | 227.7  |
|        | 58354      | Wuxi         | 94.9                                                     | 121.2 | 143.5 | 176.4 | 204.3 | 235.0  |
|        | 58356      | Kunshan      | 95.2                                                     | 121.6 | 144.0 | 177.0 | 204.9 | 235.7  |
|        | 58358      | Dongshan     | 83.7                                                     | 106.9 | 126.5 | 155.5 | 180.1 | 207.1  |
|        | 58359      | Wujiang      | 84.1                                                     | 107.5 | 127.2 | 156.4 | 181.1 | 208.3  |
|        | 58360      | Haimen       | 91.7                                                     | 119.6 | 141.0 | 169.9 | 192.1 | 214.7  |
|        | 58377      | Taicang      | 101.4                                                    | 129.5 | 153.3 | 188.5 | 218.2 | 251.0  |
| Region | Station ID | Station Name | Quantile estimates based on AMS data and Chow's equation |       |       |       |       |        |
|        |            |              | 2-yr                                                     | 5-yr  | 10-yr | 25-yr | 50-yr | 100-yr |
| II     | 58038      | Shuyang      | 109.3                                                    | 140.4 | 164.7 | 197.9 | 223.9 | 250.4  |
|        | 58040      | Ganyu        | 117.5                                                    | 150.8 | 176.9 | 212.6 | 240.5 | 269.1  |
|        | 58044      | Lianyungang  | 111.6                                                    | 143.3 | 168.1 | 202.1 | 228.6 | 255.7  |
|        | 58047      | Guanyun      | 109.1                                                    | 140.1 | 164.3 | 197.5 | 223.4 | 249.9  |
|        | 58048      | Guannan      | 106.5                                                    | 136.8 | 160.5 | 192.8 | 218.2 | 244.0  |
|        | 58049      | Binhai       | 110.0                                                    | 141.2 | 165.6 | 199.1 | 225.2 | 251.9  |
|        | 58138      | Xuyi         | 105.4                                                    | 135.4 | 158.8 | 190.8 | 215.9 | 241.5  |
|        | 58139      | Hongze       | 100.6                                                    | 129.2 | 151.6 | 182.2 | 206.1 | 230.5  |
|        | 58140      | Lianshui     | 113.4                                                    | 145.6 | 170.7 | 205.2 | 232.2 | 259.7  |
|        | 58141      | Huai'an      | 106.7                                                    | 137.0 | 160.8 | 193.2 | 218.6 | 244.5  |
|        | 58143      | Funing       | 111.7                                                    | 143.4 | 168.2 | 202.2 | 228.7 | 255.8  |
|        | 58145      | Chuzhou      | 105.6                                                    | 135.7 | 159.1 | 191.3 | 216.4 | 242.0  |
|        | 58150      | Sheyang      | 106.2                                                    | 136.4 | 160.0 | 192.3 | 217.6 | 243.4  |
| III    | 58146      | Jianhu       | 95.2                                                     | 117.4 | 136.0 | 164.4 | 189.5 | 218.2  |

|    |       |           |       |       |       |       |       |       |
|----|-------|-----------|-------|-------|-------|-------|-------|-------|
|    | 58147 | Jinhu     | 97.3  | 120.0 | 139.0 | 168.1 | 193.8 | 223.1 |
|    | 58148 | Baoying   | 92.6  | 114.2 | 132.3 | 160.0 | 184.4 | 212.3 |
|    | 58154 | Yancheng  | 95.8  | 118.2 | 137.0 | 165.6 | 190.9 | 219.8 |
|    | 58158 | Dafeng    | 108.6 | 134.0 | 155.2 | 187.7 | 216.3 | 249.1 |
|    | 58241 | Gaoyou    | 98.8  | 121.9 | 141.2 | 170.7 | 196.8 | 226.7 |
|    | 58243 | Xinghua   | 100.1 | 123.4 | 143.0 | 172.9 | 199.4 | 229.6 |
|    | 58251 | Dongtai   | 104.2 | 128.6 | 149.0 | 180.1 | 207.6 | 239.1 |
| IV | 58235 | Luhe      | 93.3  | 121.6 | 145.0 | 178.8 | 206.6 | 236.4 |
|    | 58237 | Pukou     | 107.7 | 140.5 | 167.5 | 206.5 | 238.6 | 273.0 |
|    | 58238 | Nanjing   | 101.9 | 132.9 | 158.5 | 195.4 | 225.8 | 258.3 |
|    | 58242 | Yizheng   | 96.7  | 126.1 | 150.3 | 185.3 | 214.1 | 245.0 |
|    | 58244 | Jiangdou  | 96.4  | 125.7 | 149.9 | 184.8 | 213.5 | 244.3 |
|    | 58245 | Yangzhou  | 97.5  | 127.1 | 151.5 | 186.8 | 215.9 | 247.0 |
|    | 58246 | Taizhou   | 89.1  | 116.2 | 138.5 | 170.8 | 197.3 | 225.8 |
|    | 58247 | Yangzhong | 99.5  | 129.8 | 154.7 | 190.7 | 220.4 | 252.2 |
|    | 58339 | Gaochun   | 102.4 | 133.5 | 159.1 | 196.1 | 226.7 | 259.3 |
|    | 58340 | Lishui    | 90.8  | 118.4 | 141.2 | 174.1 | 201.2 | 230.1 |
|    | 58341 | Danyang   | 94.1  | 122.7 | 146.3 | 180.4 | 208.4 | 238.5 |
|    | 58342 | Jintan    | 97.0  | 126.5 | 150.8 | 185.9 | 214.9 | 245.8 |
|    | 58344 | Jurong    | 98.2  | 128.1 | 152.7 | 188.2 | 217.5 | 248.9 |
|    | 58345 | Liyang    | 86.6  | 112.9 | 134.6 | 166.0 | 191.8 | 219.5 |
|    | 58346 | Yixing    | 90.6  | 118.1 | 140.8 | 173.6 | 200.6 | 229.5 |
| V  | 58255 | Rugao     | 96.6  | 124.7 | 147.9 | 181.7 | 209.6 | 239.7 |
|    | 58257 | Jingjiang | 94.2  | 121.6 | 144.4 | 177.3 | 204.6 | 233.9 |
|    | 58259 | Nantong   | 93.6  | 120.8 | 143.3 | 176.1 | 203.1 | 232.2 |
|    | 58264 | Rudong    | 97.1  | 125.3 | 148.7 | 182.7 | 210.8 | 240.9 |
|    | 58265 | Lusi      | 98.6  | 127.2 | 151.0 | 185.4 | 214.0 | 244.6 |
|    | 58268 | Tongzhou  | 96.4  | 124.5 | 147.7 | 181.4 | 209.4 | 239.3 |
|    | 58269 | Qidong    | 92.8  | 119.9 | 142.2 | 174.7 | 201.6 | 230.4 |
|    | 58343 | Changzhou | 94.3  | 121.7 | 144.5 | 177.4 | 204.7 | 234.0 |
|    | 58349 | Wuzhong   | 88.3  | 114.0 | 135.3 | 166.2 | 191.7 | 219.2 |
|    | 58351 | Jiangyin  | 99.2  | 128.1 | 152.0 | 186.7 | 215.4 | 246.3 |
|    | 58352 | Changshu  | 90.3  | 116.6 | 138.3 | 169.9 | 196.0 | 224.1 |
|    | 58354 | Wuxi      | 94.7  | 122.2 | 145.0 | 178.1 | 205.5 | 235.0 |
|    | 58356 | Kunshan   | 92.9  | 119.9 | 142.3 | 174.7 | 201.6 | 230.5 |
|    | 58358 | Dongshan  | 85.7  | 110.7 | 131.3 | 161.3 | 186.1 | 212.8 |
|    | 58359 | Wujiang   | 87.1  | 112.5 | 133.5 | 164.0 | 189.2 | 216.3 |
|    | 58360 | Haimen    | 91.0  | 117.4 | 139.4 | 171.2 | 197.5 | 225.8 |
|    | 58377 | Taicang   | 101.3 | 130.8 | 155.2 | 190.7 | 220.0 | 251.5 |
